# Supplementary material for: Real-Life Experience with Oral Eliglustat in Patients with Gaucher Disease Previously Treated with Enzyme Replacement Therapy
Source: MDPI journal article supplement (doi:10.3390/jcm11216265), 2022-10-24
Supplement: s1 [file s1]

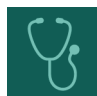

**Table S1.** Cost of Gaucher disease- specific therapy according to Israeli Ministry of Health (MoH) reports. Prices are listed in NIS, and based on the MoH prices reports from 30.12.2021 (<https://www.health.gov.il/Subjects/Finance/DrugPrice/Pages/default.aspx>).

| Drug               | Monthly Cost for a 70 kg Patient Receiving a Low Dose of ERT (30 U Monthly) | Monthly Cost for a 70 kg Patient Receiving a Medium Dose of ERT (60 U Monthly) | Monthly Cost for any Adult Patient Receiving 2 Capsules a Day |
|--------------------|-----------------------------------------------------------------------------|--------------------------------------------------------------------------------|---------------------------------------------------------------|
| Imiglucerase       | 29,816.9                                                                    | 65,597.18                                                                      |                                                               |
| Velaglucerase alfa | 32,551.85                                                                   | 71,614.07                                                                      |                                                               |
| Taliglucerase alfa | Not reported                                                                | Not reported                                                                   |                                                               |
| Eliglustat         |                                                                             |                                                                                | 87,443.35                                                     |
| Miglustat          |                                                                             |                                                                                | 19,458.42                                                     |

**Table S2.** Gaucher disease-related parameters pre, baseline and post switch.

| No./<br>Sex | Hemoglobin, g/dL |          |      | Platelet Count, $\times 10^3/\mu\text{L}$ |          |      | HDL Cholesterol, mg/dL |          |      | Ferritin, ng/mL |          |      |
|-------------|------------------|----------|------|-------------------------------------------|----------|------|------------------------|----------|------|-----------------|----------|------|
|             | Pre              | Baseline | Post | Pre                                       | Baseline | Post | Pre                    | Baseline | Post | Pre             | Baseline | Post |
| 1/M         | 14.3             | 14.9     | 14.6 | 94                                        | 100      | 100  | 36                     | 33       | 36   | 197             | 183      | 191  |
| 2/M         | 15.1             | 15       | 15.6 | 109                                       | 100      | 131  | 36                     | 34       | 35   | 313             | 344      | 155  |
| 3*/M        | 15.1             | 13.8     | 14   | 302                                       | 319      | 377  | 33                     |          | 35   | 260             | 335      | 322  |
| 5/F         | 9.9              | 11.1     | 10.9 | 34                                        | 24       | 34   | 21                     | 34       | 34   | 849             | 657      | 686  |
| 8*/F        | 13.5             | 13.4     | 12.9 | 312                                       | 272      | 248  | 29                     | 28       | 29   | 209             | 208      | 227  |
| 9/M         | 14.9             | 15       | 14.4 | 157                                       | 171      | 128  | 33.8                   | 36       | 37   | 288             | 276      | 307  |
| 12/F        | 13               | 13.1     | 12.9 | 305                                       | 369      | 355  | 51                     | 54       | 55   | 150             | 121      | 35   |
| 14/M        | 14               | 15.3     | 15   | 183                                       | 184      | 181  | 36                     | 47       | 44   | 37              | 44       | 50   |
| 17/M        | 17               | 16.1     | 16.3 | 180                                       | 155      | 170  | 34                     | 38       | 46   | 183             | 171      | 149  |
| 19/F        | 11.7             | 11.5     | 11.5 | 112                                       | 104      | 118  | 26                     | 26       | 25   | 228             | 335      | 420  |
| 20/F        | 13.4             |          | 12.5 | 119                                       |          | 103  | 48                     |          | 44   | 37              |          | 53   |
| 23/M        | 14.5             | 14.9     | 14.2 | 135                                       | 121      | 168  | 29                     | 31       | 33   | 1297            | 1177     | 1056 |

\* Splenectomized. M, Male; F, Female; Hb, Hemoglobin; Plt, Platelet count.
